# Supplementary material
Source: Springer Nature journal article supplement (https://www.springermedizin.de/resource/supplementary/12885_2011_2860_MOESM5_ESM.pdf/9462190)

## Clinical fracture risk factors

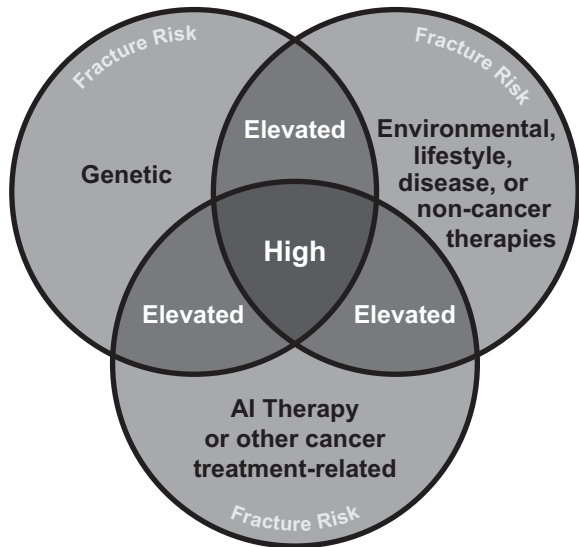

## BMD

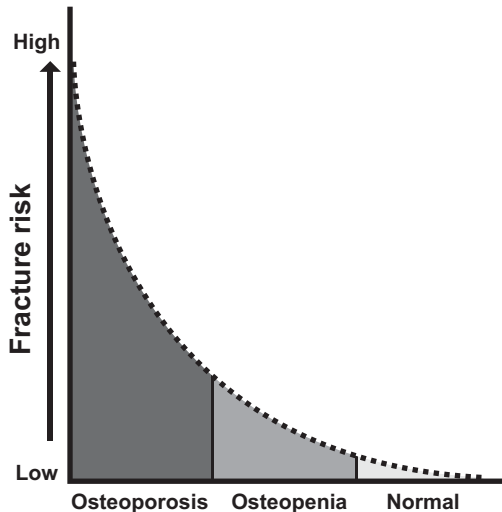

**Optimal fracture risk assessment**

Supplement: MOESM5 [file 9462190]
